# Supplementary material for: Design and self-assembly of PBLG-b-ELP hybrid diblock copolymers based on synthetic and elastin-like polypeptides
Source: Royal Society of Chemistry journal article supplement (doi:10.1039/c7ob01945a), 2017-01-01
Supplement: c7ob01945a1.pdf [file c7ob01945a1.pdf]

SUPPORTING INFORMATION:

**Design and self-assembly of PBLG-*b*-ELP hybrid diblock copolymers based  
on synthetic and elastin-like polypeptides**

Gaëlle Le Fer<sup>§†</sup>, Delphine Portes<sup>§†</sup>, Guillaume Goudounet<sup>§†</sup>, Jean-Michel Guigner<sup>‡</sup>, Elisabeth Garanger<sup>§†</sup>, Sébastien Lecommandoux<sup>§†\*</sup>

§Université de Bordeaux/Bordeaux INP, ENSCBP, 16 avenue Pey-Berland, Pessac 33607, France

†CNRS, Laboratoire de Chimie des Polymères Organiques (UMR5629), Pessac, France

‡Institut de Minéralogie et de Physique des Milieux Condensés (IMPMC) 4 place Jussieu - 75005 Paris – France

**Synthesis mechanism hypothesis**

Because the purification of ELP involves the use of sodium chloride, we can reasonably assume the polymerization to be initiated by the *N*-terminal ammonium group of the ELP with the chloride Cl<sup>-</sup> as counter-anion. Consequently, the block copolypeptides poly( $\gamma$ -benzyl-*L*-glutamate)-*block*-ELP were synthesized by ROP of the  $\gamma$ -BLG NCA initiated by the primary ammonium end group of the ELP.

It was previously postulated by Schlaad *et al.* that the ammonium-mediated ROP mechanism may lead to a controlled propagation comparable to nitroxyde-mediated radical or living cationic polymerizations involving an equilibrium between dormant (ammonium) and active (amine) chain ends<sup>1</sup> provided that the counter-anion, here the nucleophilic chloride anion, is quite mobile in the medium.<sup>1,2</sup> The ammonium salt in addition is suspected to suppress the activated monomer mechanism (AMM) due to protonation of the NCA anions.<sup>1</sup>

Interestingly, in the present case of the polymerization of  $\gamma$ -BLG NCA, we suspect the ELP macroinitiator to afford sufficient polarity to the medium to allow an excellent control of ammonium-mediated ROP with the chloride counterion. We additionally presume the formation of hydrogen bonds between the polypeptide chain amide groups and the  $\gamma$ -BLG NCA, stabilizing the latter and limiting the AMM mechanism, and consequently favoring the normal NAM amine mechanism.

**Table S1.** Molecular characteristics of ELP and hybrid diblock copolypeptides PBLG-*b*-ELP obtained by ROP of  $\gamma$ -BLG NCA at 25 °C.

| # | Copolypeptide                          | Expected DP<br>(PBLG) | DP PBLG<br>( <sup>1</sup> H NMR) | $\overline{M}_n$<br><sup>1</sup> H NMR<br>(g.mol <sup>-1</sup> ) | <i>f</i> (%)<br><sup>1</sup> H NMR | $\overline{M}_n$<br>SEC*<br>(g.mol <sup>-1</sup> ) | <i>D</i><br>SEC* | Yield<br>(%) |
|---|----------------------------------------|-----------------------|----------------------------------|------------------------------------------------------------------|------------------------------------|----------------------------------------------------|------------------|--------------|
| - | <b>ELP</b>                             | -                     | -                                | 17,000                                                           | -                                  | 18,000                                             | 1.03             | -            |
| 1 | <b>PBLG<sub>21</sub>-<i>b</i>-ELP</b>  | 52                    | 21                               | 21,600                                                           | 79                                 | 24,900                                             | 1.03             | 73           |
| 2 | <b>PBLG<sub>33</sub>-<i>b</i>-ELP</b>  | 78                    | 33                               | 24,300                                                           | 70                                 | 30,200                                             | 1.06             | 80           |
| 3 | <b>PBLG<sub>61</sub>-<i>b</i>-ELP</b>  | 117                   | 61                               | 30,400                                                           | 56                                 | 37,100                                             | 1.15             | 77           |
| 4 | <b>PBLG<sub>110</sub>-<i>b</i>-ELP</b> | 181                   | 110                              | 41,200                                                           | 41                                 | 44,800                                             | 1.20             | 70           |

\**f*: hydrophilic weight fraction determined from the  $\overline{M}_n$  calculated by <sup>1</sup>H NMR

\*\*SEC in DMF (0.8 mL.min<sup>-1</sup>) at 50 °C in the presence of LiBr (1 g.L<sup>-1</sup>) with RI detector and polystyrene used as standard.

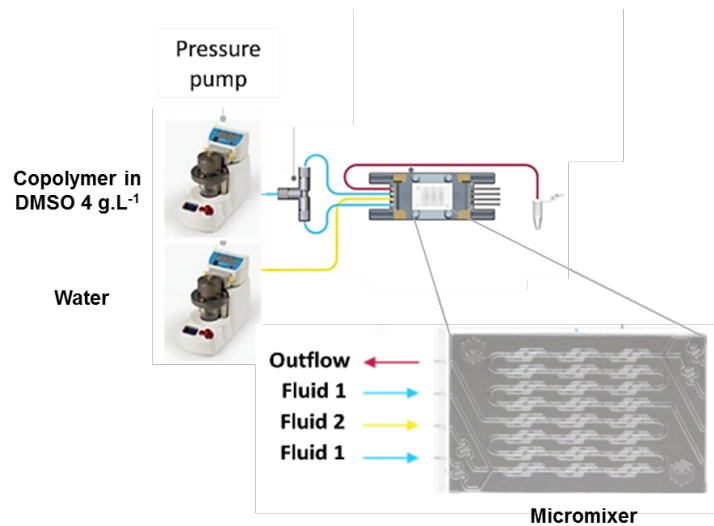

**Scheme S1.** Schematic representation of the microfluidics device used.

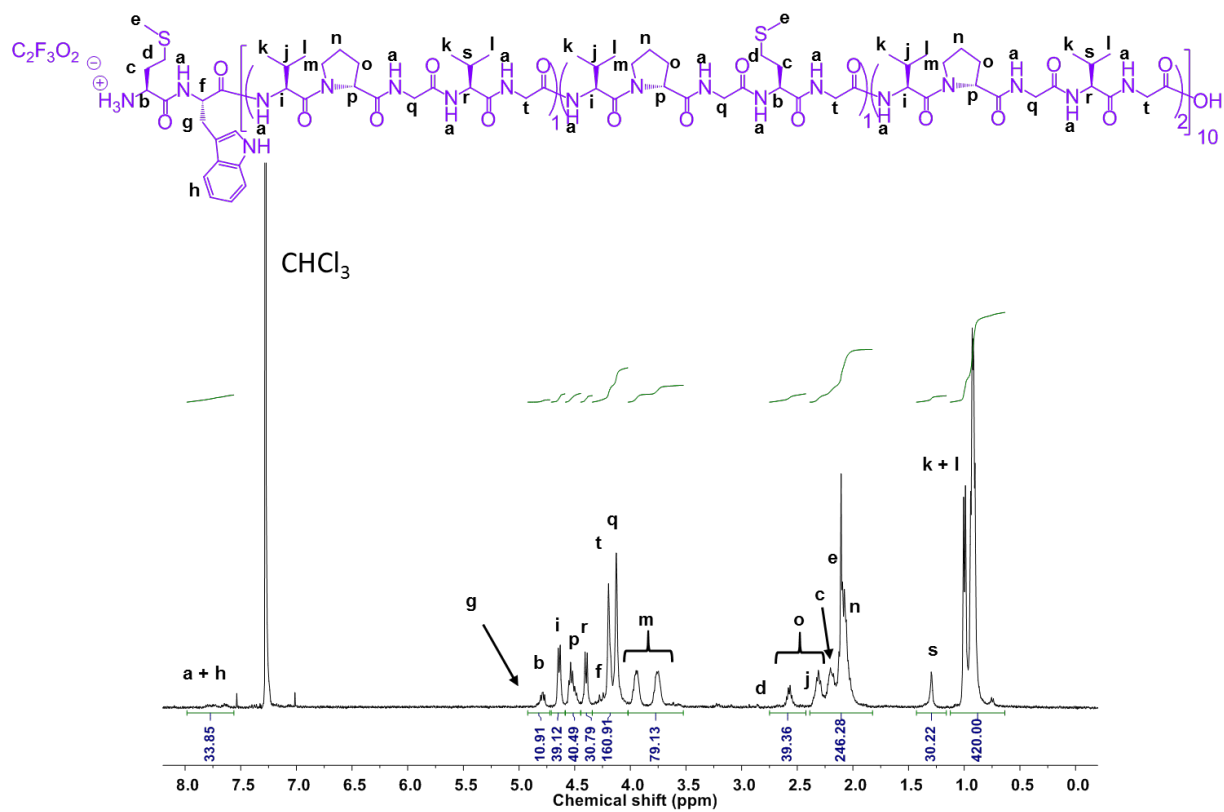

**Figure S1.**  $^1\text{H}$  NMR spectrum of ELP in  $\text{CDCl}_3$  containing 15 % trifluoroacetic acid (TFA).

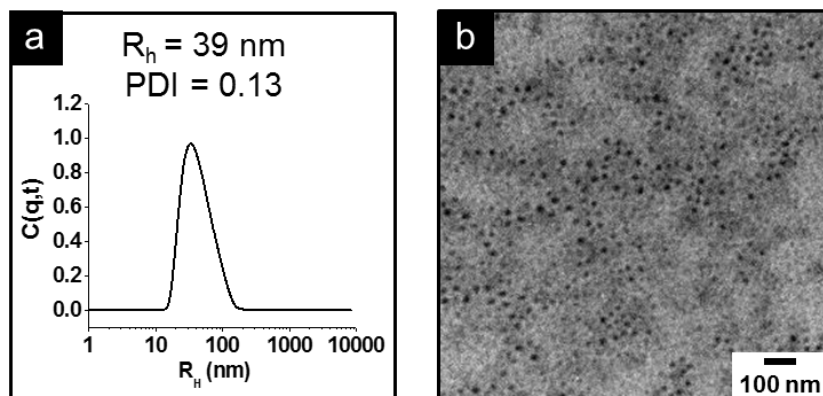

**Figure S2.** (a) Size distribution of nano-particles by DLS.(b) TEM micrographs of nano-particles obtained from PBLG<sub>25</sub>-*b*-ELP by direct solubilization.

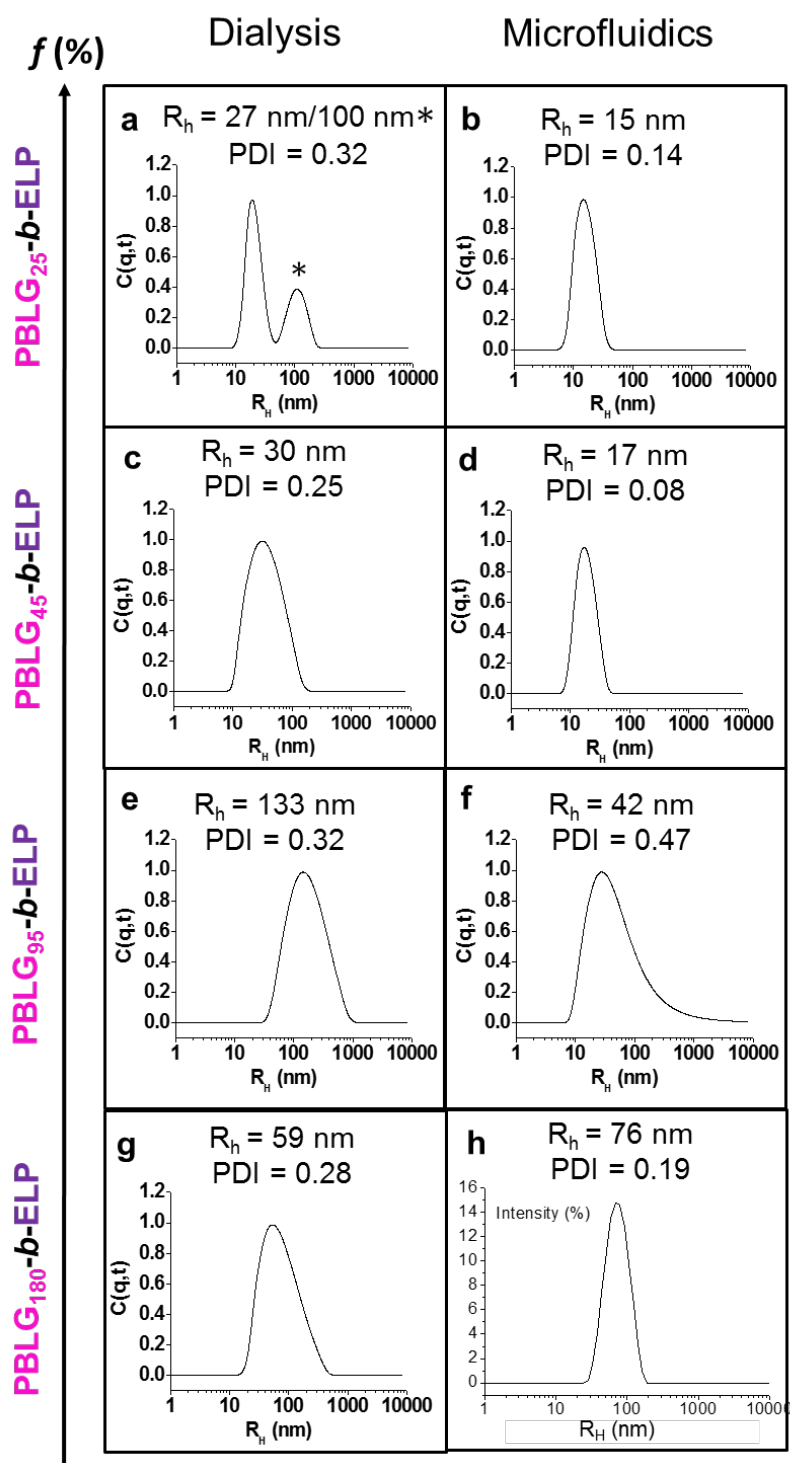

**Figure S3.** Size distribution of nano-particles by DLS depending on the technique of self-assembly process. (i) Characterized directly after the formation of nano-objects. Ratio DMSO:H<sub>2</sub>O by microfluidics is 70:30.

- (1) Dimitrov, I.; Schlaad, H. *Chemical Communications* **2003**, 2944-2945.
- (2) Lutz, J. F.; Schütt, D.; Kubowicz, S. *Macromolecular rapid communications* **2005**, 26, 23-28.
